# Supplementary material for: Medication Intake Is Associated with Lower Plasma Carotenoids and Higher Fat-Soluble Vitamins in the Cross-Sectional MARK-AGE Study in Older Individuals
Source: PubMed Central journal article supplement (PMC7408954; doi:10.3390/jcm9072072), 2020-07-01
Supplement: jcm-09-02072-s001.pdf [file jcm-09-02072-s001.pdf]

**Supplemental Table S1. Association of medication intake with biomarkers in the youngest and oldest age groups after adjusting for covariables**

|                                                                                          | Age Group: 35 - 44 years |              |                                   |                                |              | Age Group: 65 - 75 years |              |                                   |                                |              |
|------------------------------------------------------------------------------------------|--------------------------|--------------|-----------------------------------|--------------------------------|--------------|--------------------------|--------------|-----------------------------------|--------------------------------|--------------|
|                                                                                          | B (95% CI)               | ( $\eta^2$ ) | Difference <sup>2</sup><br>(unit) | Difference <sup>3</sup><br>(%) | P            | B (95% CI)               | ( $\eta^2$ ) | Difference <sup>2</sup><br>(unit) | Difference <sup>3</sup><br>(%) | P            |
| <b>(SR) Ascorbic Acid (mg/L)</b>                                                         |                          |              |                                   |                                |              |                          |              |                                   |                                |              |
| Medication (4 Groups)                                                                    | 0.085 (-0.058; 0.228)    | 0.003        | 0.043                             | 1.01                           | 0.244        | -0.038 (-0.088; 0.013)   | 0.003        | -0.034                            | -7.92                          | 0.142        |
| Medication (4 Groups), adj. <sup>1</sup>                                                 | 0.002 (-0.102; 0.106)    | 0.000        | 0.69                              | 0.03                           | 0.971        | -0.004 (-0.042; 0.034)   | 0.000        | -0.078                            | -1.81                          | 0.832        |
| <b>(SR) Lutein (<math>\mu\text{mol/l}</math>)</b>                                        |                          |              |                                   |                                |              |                          |              |                                   |                                |              |
| Medication (4 Groups)                                                                    | -0.011 (-0.036; 0.013)   | 0.002        | -0.012                            | -4.76                          | 0.365        | -0.009 (-0.021; 0.003)   | 0.004        | -0.010                            | -3.64                          | 0.147        |
| Medication (4 Groups), adj. <sup>1</sup>                                                 | -0.018 (-0.041; 0.006)   | 0.005        | -0.016                            | -6.40                          | 0.140        | -0.003 (-0.015; 0.009)   | 0.000        | -0.004                            | -1.62                          | 0.650        |
| <b>(Ln) <math>\alpha</math>-Carotene (<math>\mu\text{mol/l}</math>)</b>                  |                          |              |                                   |                                |              |                          |              |                                   |                                |              |
| Medication (4 Groups)                                                                    | 0.093 (-0.060; 0.247)    | 0.003        | 0.011                             | 7.23                           | 0.232        | -0.054 (-0.118; 0.011)   | 0.005        | -0.008                            | -6.63                          | 0.102        |
| Medication (4 Groups), adj. <sup>1</sup>                                                 | -0.055 (-0.187; 0.078)   | 0.001        | -0.013                            | -8.31                          | 0.418        | -0.067 (-0.125; -0.008)  | 0.010        | -0.039                            | -31.42                         | <b>0.025</b> |
| <b>(Ln) <math>\beta</math>-Cryptoxanthin (<math>\mu\text{mol/l}</math>)</b>              |                          |              |                                   |                                |              |                          |              |                                   |                                |              |
| Medication (4 Groups)                                                                    | -0.030 (-0.175; 0.116)   | 0.000        | -0.005                            | -3.20                          | 0.690        | -0.047 (-0.109; 0.015)   | 0.003        | -0.012                            | -5.58                          | 0.138        |
| Medication (4 Groups), adj. <sup>1</sup>                                                 | -0.089 (-0.224; 0.045)   | 0.004        | -0.018                            | -10.66                         | 0.191        | 0.012 (-0.038; 0.062)    | 0.000        | 0.015                             | 6.65                           | 0.641        |
| <b>(SR) Lycopene (<math>\mu\text{mol/l}</math>)</b>                                      |                          |              |                                   |                                |              |                          |              |                                   |                                |              |
| Medication (4 Groups)                                                                    | -0.040 (-0.079; -0.001)  | 0.008        | -0.081                            | -9.99                          | <b>0.046</b> | -0.006 (-0.024; 0.013)   | 0.001        | -0.008                            | -1.56                          | 0.555        |
| Medication (4 Groups), adj. <sup>1</sup>                                                 | -0.019 (-0.058; 0.020)   | 0.002        | -0.047                            | -5.83                          | 0.339        | -0.006 (-0.024; 0.013)   | 0.001        | -0.020                            | -3.74                          | 0.553        |
| <b>(Ln) <math>\gamma</math>-Tocopherol (<math>\mu\text{mol/l}</math>)</b>                |                          |              |                                   |                                |              |                          |              |                                   |                                |              |
| Medication (4 Groups)                                                                    | 0.017 (-0.089; 0.123)    | 0.000        | 0.018                             | 1.62                           | 0.753        | -0.030 (-0.074; 0.014)   | 0.003        | -0.045                            | -3.35                          | 0.184        |
| Medication (4 Groups), adj. <sup>1</sup>                                                 | -0.044 (-0.136; 0.048)   | 0.002        | -0.015                            | -1.36                          | 0.345        | -0.022 (-0.067; 0.022)   | 0.002        | -0.016                            | -1.21                          | 0.326        |
| <b>(Ln) <math>\gamma</math>-Tocopherol/Cholesterol (<math>\mu\text{mol/mmol}</math>)</b> |                          |              |                                   |                                |              |                          |              |                                   |                                |              |
| Medication (4 Groups)                                                                    | 0.056 (-0.045; 0.161)    | 0.003        | 0.010                             | 4.83                           | 0.288        | 0.033 (-0.010; 0.077)    | 0.004        | 0.007                             | 2.88                           | 0.134        |
| Medication (4 Groups), adj. <sup>1</sup>                                                 | -0.015 (-0.107; 0.078)   | 0.000        | -0.001                            | -0.58                          | 0.753        | 0.042 (0.000; 0.085)     | 0.008        | 0.004                             | 1.53                           | 0.052        |

Multiple linear regression with medication group ( $n = 4$ ) as covariate; (SR) square root transformed; (Ln) logarithmic transformed. Regression coefficient B represents the increase/decrease in the respective compound for each multiple linear regression model.

<sup>1</sup> adjusted for age (linear), sex, BMI, smoking status, frequency of dietary habits (fruit, vegetables, and juice per week), and use of vitamin supplements as covariates, and country and season as co-factors.

<sup>2</sup> Mean differences per medication intake of back-transformed data (unit) considering the intercept of each model;

<sup>3</sup> Differences in biomarker concentrations as percentage (%) of the geometric means (Ascorbic Acid: 35-44 years: 4266 mg/L, 65-75 years: 4.290 mg/L; Lutein; 35-44 years: 0.254  $\mu\text{mol/l}$ ; 65-75 years: 0.277  $\mu\text{mol/l}$ ;  $\alpha$ -Carotene: 35-44 years: 0.154  $\mu\text{mol/l}$ ; 65-75 years: 0.123  $\mu\text{mol/l}$ ;  $\beta$ -Cryptoxanthin: 35-44 years: 0.168  $\mu\text{mol/l}$ ; 65-75 years: 0.219  $\mu\text{mol/l}$ ; Lycopene: 35-44 years: 0.809  $\mu\text{mol/l}$ ; 65-75 years: 0.540  $\mu\text{mol/l}$ ;  $\gamma$ -Tocopherol: 35-44 years: 1.126  $\mu\text{mol/l}$ ; 65-75 years: 1.350  $\mu\text{mol/l}$ ;  $\gamma$ -Tocopherol/Cholesterol: 35-44 years: 0.217  $\mu\text{mol/mmol}$ ; 65-75 years: 0.255  $\mu\text{mol/mmol}$ )
